# Supplementary material for: Dy3+ and Tb3+ codoped mixed garnet crystals with a high-disorder structure for promising efficient InGaN laser-diode pumped yellow lasers
Source: Royal Society of Chemistry journal article supplement (doi:10.1039/d3ce00780d), 2023-01-01
Supplement: d3ce00780d1.pdf [file d3ce00780d1.pdf]

## Supporting Information for:

# **Dy<sup>3+</sup> and Tb<sup>3+</sup> codoped mixed garnet crystals with high-disorder structure for promising efficient InGaN laser-diode pumped yellow lasers**

Shoujun Ding <sup>a,b,c\*</sup>, Chuancheng Zhang <sup>a</sup>, Hao Ren <sup>a</sup>, Miaomiao Wang <sup>a</sup>, Xianshan Huang <sup>a</sup>, Yong Zou <sup>a</sup>, Xubing Tang <sup>a</sup>, Wenpeng Liu <sup>b</sup>, Qingli Zhang <sup>b</sup>

<sup>a</sup> School of Microelectronics and Data Science, Anhui University of Technology, Maanshan, Anhui, 243002, PR China

<sup>b</sup> Advanced Laser Technology Laboratory of Anhui Province, Hefei, Anhui, 230037, PR China

<sup>c</sup> Anhui Institute of Optics and Fine Mechanics, Chinese Academy of Sciences, Hefei, Anhui, 230031, PR China

## Content

|                                                                                               |          |
|-----------------------------------------------------------------------------------------------|----------|
| <b>1. Rietveld refinement result .....</b>                                                    | <b>2</b> |
| <b>2. Density of the crystals .....</b>                                                       | <b>2</b> |
| <b>3. Elements mapping and effective segregation coefficient of Dy<sup>3+</sup> .....</b>     | <b>3</b> |
| <b>4. Judd-Ofelt (J-O) calculation .....</b>                                                  | <b>3</b> |
| <b>5. The emission cross section of Dy,Tb:GYSAG(1) crystal .....</b>                          | <b>5</b> |
| <b>6. The CIE 1931 chromaticity coordinate values .....</b>                                   | <b>5</b> |
| <b>7. The emission spectra of Dy,Tb:GYSAG(1) crystal upon 355 and 266 nm excitation .....</b> | <b>6</b> |
| <b>REFERENCES .....</b>                                                                       | <b>6</b> |

---

\* corresponding author e-mail: [sjding@ahut.edu.cn](mailto:sjding@ahut.edu.cn) (S.J. Ding)

## 1. Rietveld refinement result

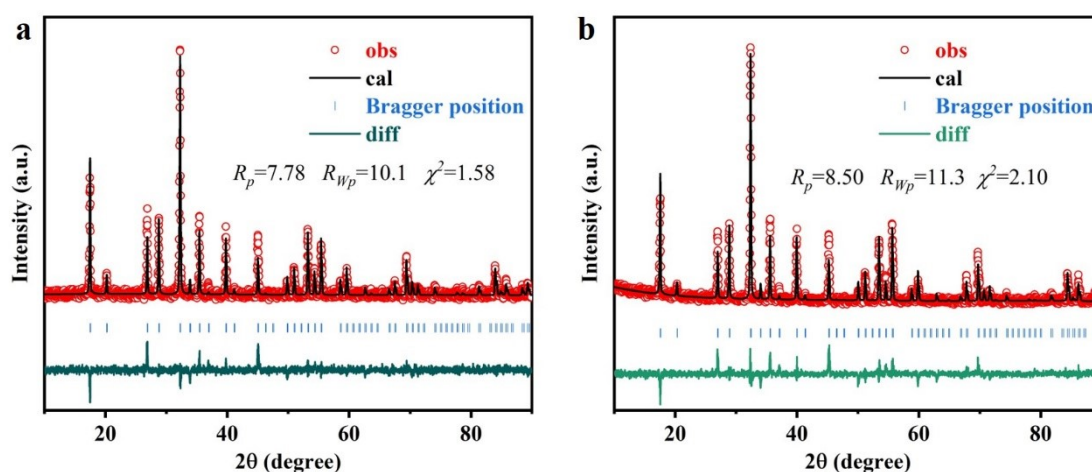

Fig.S1 Rietveld refinement XRD patterns of Dy,Tb:GYSAG(1) and Dy,Tb:GYSAG(2).

Table S1 The structural parameters obtained from the refinement of the Dy,Tb:GYSAG(1) crystal

| Atoms  | x      | y      | z     | Occupancy | Wyckoff site |
|--------|--------|--------|-------|-----------|--------------|
| Gd     | 0.375  | 0.000  | 0.250 | 0.247     | 24d          |
| Al (1) | 0.000  | 0.000  | 0.000 | 0.024     | 16a          |
| Al (2) | 0.125  | 0.000  | 0.250 | 0.243     | 24c          |
| Sc (1) | 0.375  | 0.000  | 0.250 | 0.008     | 24d          |
| Sc (2) | 0.000  | 0.000  | 0.000 | 0.145     | 16a          |
| O      | 0.0296 | -0.043 | 0.154 | 1.000     | 96h          |

$a=b=c=12.143 \text{ \AA}, \alpha=\beta=\gamma=90^\circ$

Table S2 The structural parameters obtained from the refinement of the Dy,Tb:GYSAG(2) crystal

| Atoms  | x      | y      | z     | Occupancy | Wyckoff site |
|--------|--------|--------|-------|-----------|--------------|
| Gd     | 0.375  | 0.000  | 0.250 | 0.247     | 24d          |
| Al (1) | 0.000  | 0.000  | 0.000 | 0.024     | 16a          |
| Al (2) | 0.125  | 0.000  | 0.250 | 0.243     | 24c          |
| Sc (1) | 0.375  | 0.000  | 0.250 | 0.008     | 24d          |
| Sc (2) | 0.000  | 0.000  | 0.000 | 0.145     | 16a          |
| O      | 0.0200 | -0.047 | 0.159 | 1.000     | 96h          |

$a=b=c=12.015 \text{ \AA}, \alpha=\beta=\gamma=90^\circ$

## 2. Density of the crystals

The density of the mixed garnet crystals was measured by Archimedes method. The schematic diagram of the measurement is shown Fig.S2. The  $\rho_0$  in the formula is the density of the water at room temperature. The  $m_0$ ,  $m_1$  and  $m_2$  represents the mass of dried sample in air, the mass of the water and the mass of the sample completely immersed in the water, respectively.

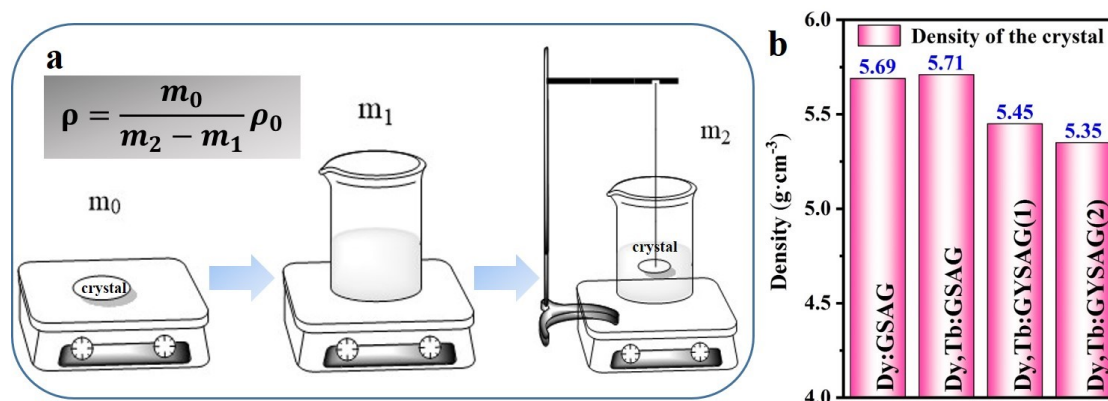

Fig.S2 (a) The schematic diagram of the crystal density measurement. (b) Measured crystal densities of the mixed garnet crystals.

## 3. Elements mapping and effective segregation coefficient of $\text{Dy}^{3+}$

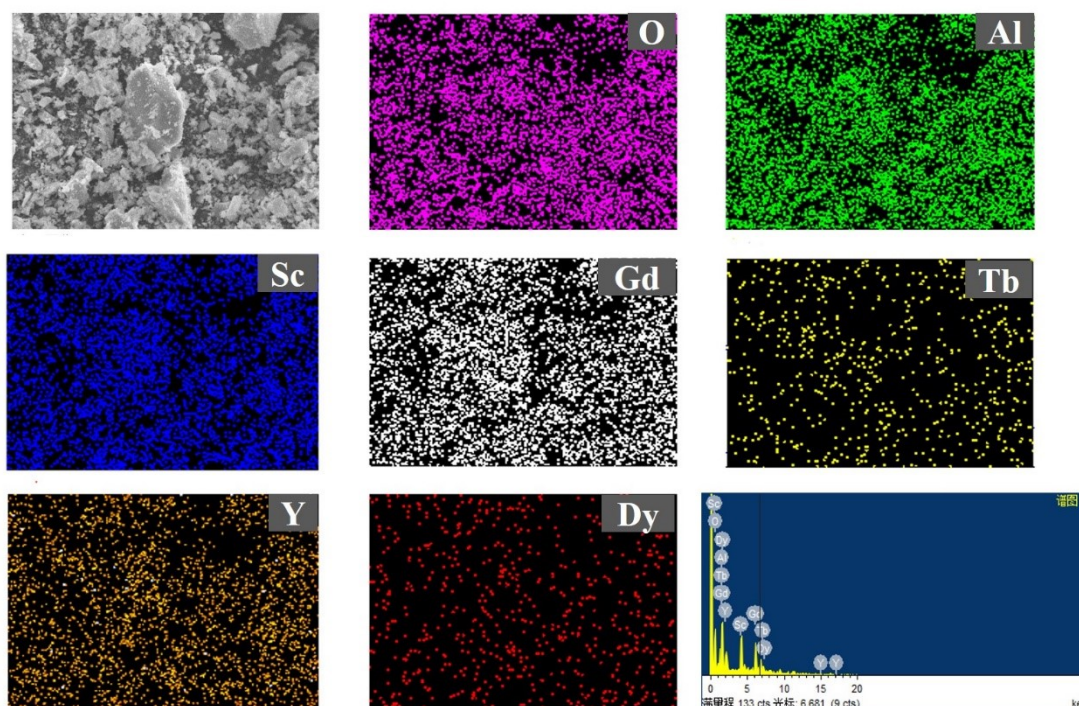

Fig.S3 Elements mapping and quantitative analysis of elements in the crystal by SEM-EDS measurement.

#### 4. Judd-Ofelt (J-O) calculation

In this work, the J-O calculation for Dy,Tb:GYSAG crystal was performed according to the absorption spectrum (exclude the Tb<sup>3+</sup> absorption). The detailed J-O calculation procedure is similar to that reported in the Ref.[1,2]. The square of the reduced matrix elements  $U^{(t)}$  used for the J-O calculation has been described by Carnall et al [3]. The J-O parameters, including experimental and calculated oscillator strengths, were calculated and listed in Table S1. The relative square deviation  $R$  were fitted as 7.98%, indicating the high reliability of the calculated results. The three intensity parameters  $\Omega_t$  ( $t=2, 4, 6$ ) were fitted as  $2.47 \times 10^{-20} \text{ cm}^2$ ,  $0.98 \times 10^{-20} \text{ cm}^2$  and  $2.92 \times 10^{-20} \text{ cm}^2$ , respectively. Using the fitted J-O intensity parameters, the radiative properties of the  $^4F_{9/2}$  excited state of Dy<sup>3+</sup>, including electric-dipole transition probability ( $A_{ed}$ ), magnetic-dipole transition probability ( $A_{md}$ ) and fluorescence branching ratio ( $\beta$ ), are calculated as listed in Table S2.

Table S3 Experimental and calculated oscillator strengths as well as J-O intensity parameters of Dy<sup>3+</sup> in Dy,Tb:GYSAG crystal

| $^6H_{15/2} \rightarrow ^{2S+1}L_J$ transitions | $\lambda$ (nm) | $f_{ed}^{exp}$ ( $\times 10^{-6}$ ) | $f_{ed}^{cal}$ ( $\times 10^{-6}$ ) | $f_{ed}^{exp-cal}$ ( $\times 10^{-6}$ ) |
|-------------------------------------------------|----------------|-------------------------------------|-------------------------------------|-----------------------------------------|
| $^4G_{11/2}$                                    | 428            | 0.1359                              | 0.1330                              | 0.0029                                  |
| $^4I_{15/2}$                                    | 453            | 0.7521                              | 0.6705                              | 0.0816                                  |
| $^4F_{9/2}$                                     | 475            | 0.1113                              | 0.2866                              | -0.1753                                 |
| $^6F_{3/2}$                                     | 751            | 0.2844                              | 0.3018                              | -0.0174                                 |
| $^6F_{5/2}$                                     | 805            | 1.5322                              | 1.5991                              | -0.0669                                 |
| $^6F_{7/2}$                                     | 901            | 2.9344                              | 3.4251                              | -0.4907                                 |
| $^6F_{9/2} + ^6H_{7/2}$                         | 1095           | 3.3194                              | 4.2605                              | -0.9411                                 |
| $^6F_{11/2} + ^6H_{9/2}$                        | 1280           | 4.3832                              | 5.6381                              | -1.2549                                 |
| $^6H_{11/2}$                                    | 1690           | 1.8878                              | 1.4930                              | 0.3948                                  |

Relative square deviation:  $R=7.98\%$ ;  $\Omega_2=2.47$ ,  $\Omega_4=0.98$ ,  $\Omega_6=2.92$

Table S4 Transition probability, fluorescence branching ratio, and radiative lifetime of Dy<sup>3+</sup> in Dy,Tb:GYSAG crystal

| $^4F_{9/2} \rightarrow ^{2S+1}L_J$ transitions | $\lambda$ (nm) | $S_{ed}$ ( $10^{-20} \text{ cm}^2$ ) | $S_{md}$ ( $10^{-20} \text{ cm}^2$ ) | $A_{ed}$ ( $s^{-1}$ ) | $\beta$ (%) | $\tau_{rad}$ (ms) |
|------------------------------------------------|----------------|--------------------------------------|--------------------------------------|-----------------------|-------------|-------------------|
| $^6F_{1/2}$                                    | 1490           | 0.00045                              | 0                                    | 0.0689                | 0.0044      | 0.644             |
| $^6F_{3/2}$                                    | 1375           | 0.00078                              | 0                                    | 0.1512                | 0.0097      |                   |
| $^6F_{5/2}$                                    | 1239           | 0.02033                              | 0                                    | 5.3972                | 0.3475      |                   |
| $^6F_{7/2}$                                    | 1052           | 0.01510                              | 0.0200                               | 6.5404                | 0.9928      |                   |

|                       |     |         |         |         |        |
|-----------------------|-----|---------|---------|---------|--------|
| ${}^6\text{H}_{5/2}$  | 941 | 0.00815 | 0       | 4.9348  | 0.3177 |
| ${}^6\text{F}_{9/2}$  | 873 | 0.00986 | 0.0120  | 7.4863  | 1.0828 |
| ${}^6\text{H}_{7/2}$  | 856 | 0.03442 | 0.00692 | 27.7509 | 2.1544 |
| ${}^6\text{F}_{11/2}$ | 799 | 0.01868 | 0.07808 | 18.5212 | 6.2949 |
| ${}^6\text{H}_{9/2}$  | 762 | 0.01995 | 0.00449 | 22.7827 | 1.8052 |
| ${}^6\text{H}_{11/2}$ | 667 | 0.04000 | 0.01503 | 68.0019 | 6.0624 |
| ${}^6\text{H}_{13/2}$ | 582 | 0.32492 | 0       | 830.123 | 53.445 |
| ${}^6\text{H}_{15/2}$ | 490 | 0.09958 | 0       | 426.880 | 27.483 |

### 5. The emission cross section of Dy,Tb:GYSAG(1) crystal

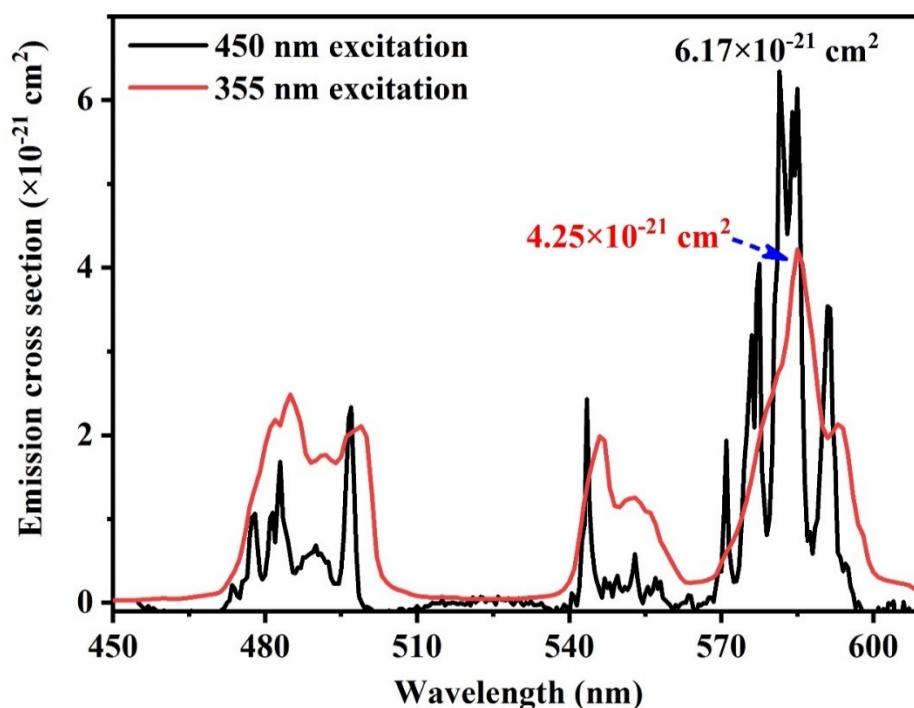

Fig.S4 The calculated emission cross sections upon 355 nm and 450 nm excitation.

### 6. The CIE 1931 chromaticity coordinate values

Table S5 The CIE 1931 chromaticity coordinate values of  $\text{Dy}^{3+}$  and  $\text{Dy}^{3+}/\text{Tb}^{3+}$  copdoped mixed garnet crystals upon 450 nm, 355 nm and 266 nm excitation.

| Excitation wavelength | Crystals       | (CIE <sub>x</sub> , CIE <sub>y</sub> ) | Peak wavelengths |
|-----------------------|----------------|----------------------------------------|------------------|
| 450 nm                | Dy:GSAG        | (0.4009, 0.4135)                       | 585 nm           |
|                       | Dy,Tb:GSAG     | (0.3889, 0.4184)                       | 585 nm           |
|                       | Dy,Tb:GYSAG(1) | (0.3861, 0.4178)                       | 585 nm           |

|        |                |                  |        |
|--------|----------------|------------------|--------|
|        | Dy,Tb:GSYAG(2) | (0.3838, 0.4173) | 585 nm |
| 355 nm | Dy:GSAG        | (0.3162, 0.3522) | 485 nm |
|        | Dy,Tb:GSAG     | (0.3230, 0.4115) | 485 nm |
|        | Dy,Tb:GYSAG(1) | (0.3095, 0.4006) | 485 nm |
|        | Dy,Tb:GSYAG(2) | (0.3261, 0.4175) | 485 nm |
|        | Dy:GSAG        | (0.3873, 0.3879) | 585 nm |
| 266 nm | Dy,Tb:GSAG     | (0.3193, 0.5326) | 545 nm |
|        | Dy,Tb:GYSAG(1) | (0.3229, 0.5337) | 546 nm |
|        | Dy,Tb:GSYAG(2) | (0.3182, 0.5342) | 546 nm |

## 7. The emission spectra of Dy,Tb:GYSAG(1) crystal upon 355 and 266 nm excitation

It can be seen from the Fig.S5(a) that the emission intensity of  ${}^5D_4 \rightarrow {}^7F_J$  transition (Green color as depicted in Fig.S5(b)) of  $Tb^{3+}$  is far stronger than that of  ${}^5D_3 \rightarrow {}^7F_J$  transition (Blue color as depicted in Fig.S5(b)).

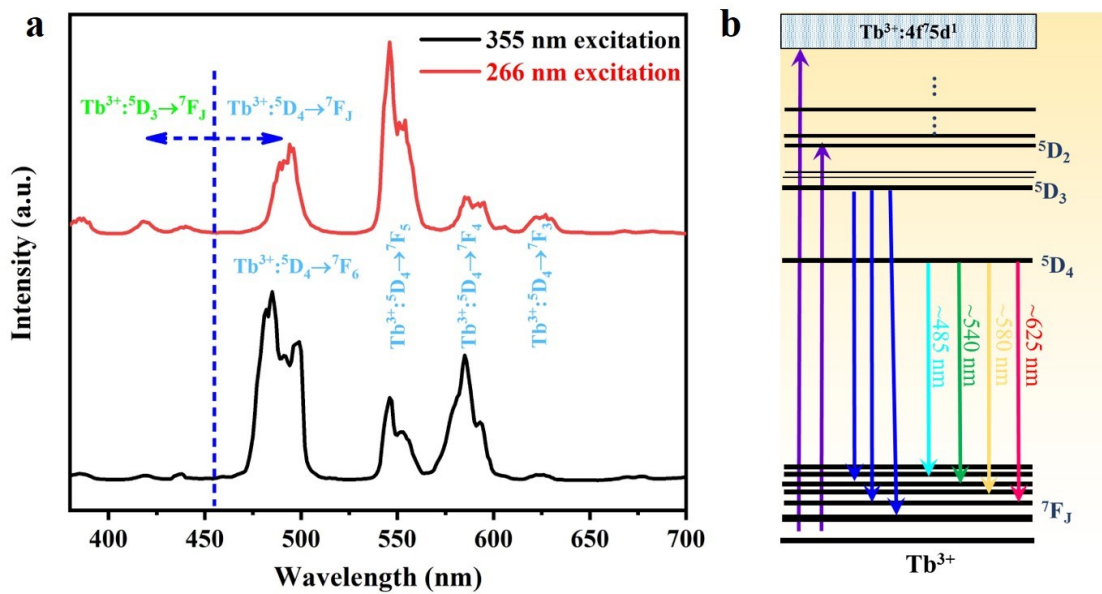

Fig.S5 (a) The 355 nm and 266 nm excited emission spectra of Dy,Tb:GYSAG(1) crystal. (b) The Schematic energy levels of  $Tb^{3+}$ .

## REFERENCES

- [1] Y. Pan, S. Zhou, D. Li, B. Liu, Q. Song, J. Liu, P. Liu, Y. Ding, X. Wang, X. Xu, Physica B: Condensed Matter 530 (2018) 317.

- [2] B. Liu, J. Shi, Q. Wang, H. Tang, J. Liu, H. Zhao, D. Li, J. Liu, X. Xu, Z. Wang, *Optical Materials* 72 (2017) 208.
- [3] W. Carnall, G. Goodman, K. Rajnak, R. Rana, *The Journal of Chemical Physics* 90 (1989) 3443.
